# Supplementary material for: Effects of oral milk extracellular vesicles on the gut microbiome and serum metabolome in mice
Source: Royal Society of Chemistry journal article supplement (doi:10.1039/d1fo02255e), 2021-01-01
Supplement: d1fo02255e1.pdf [file d1fo02255e1.pdf]

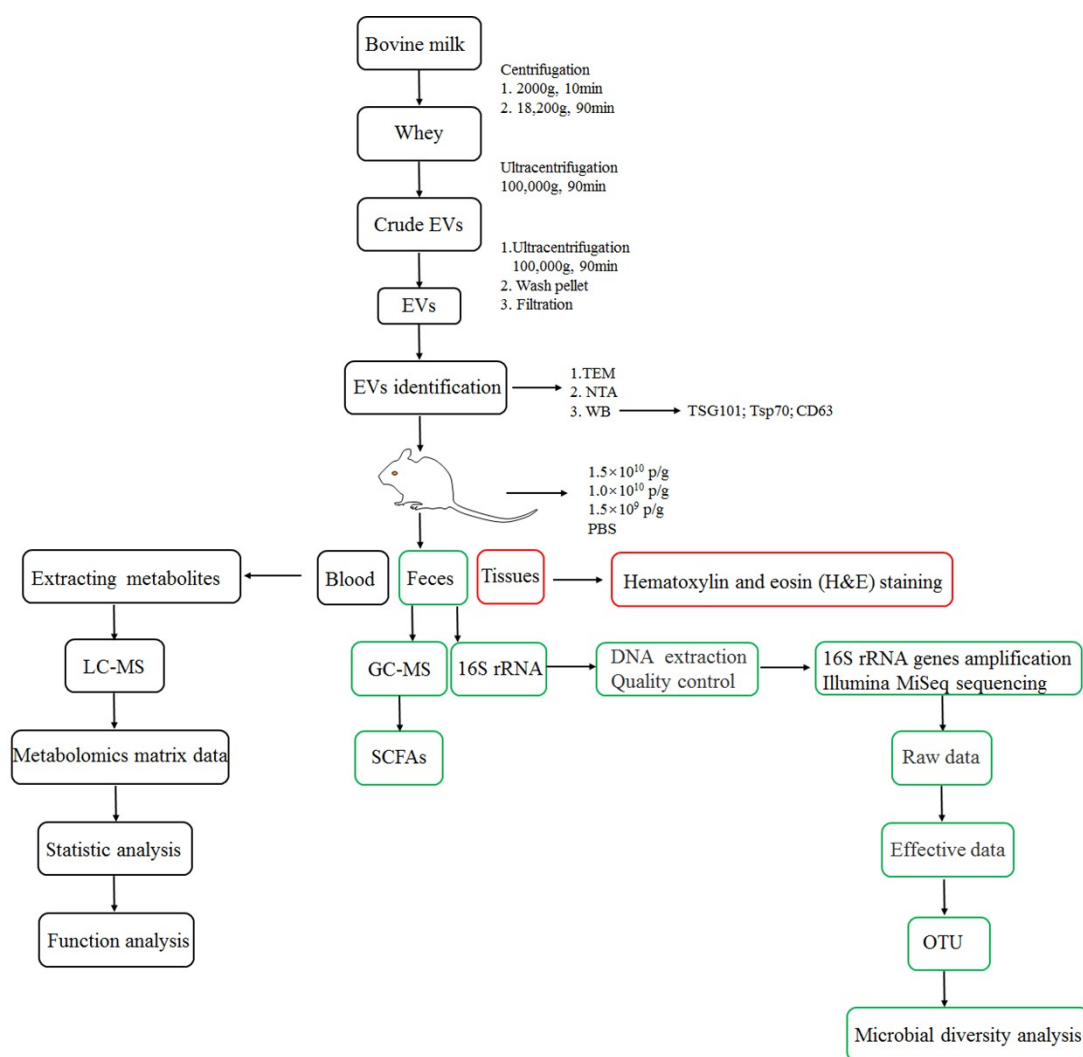

**Figure S1.** Schematic representation of the detailed steps involved in the experimental protocol.

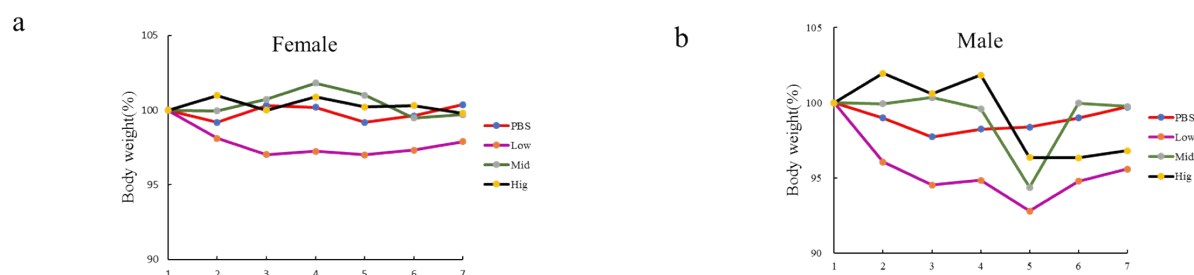

**Figure S2** The changes of mice body weights during oral gavage different concentrations of milk EVs. **a** female mice, **b** male mice.

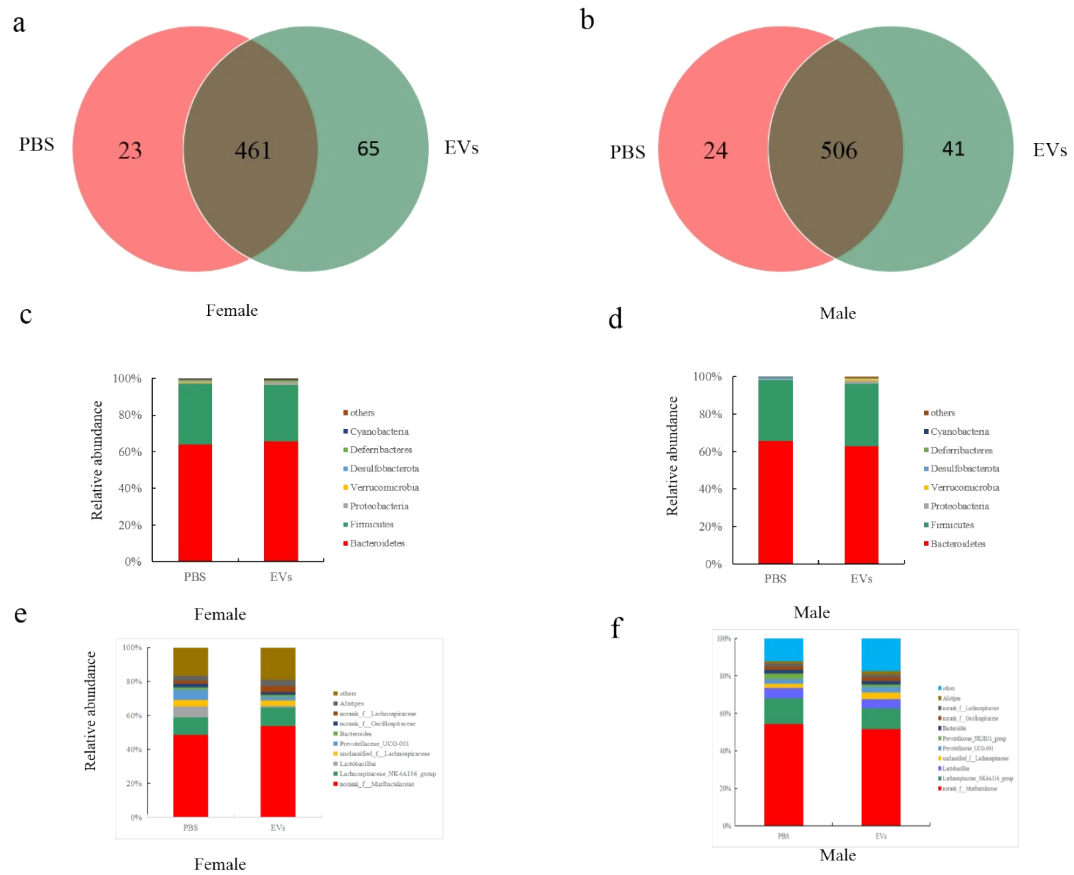

**Figure S3.** Effects of EVs on OTUs and composition of microbiota. **a-b** OTUs. **c-d** The composition of the predominant bacterial phyla. **e-f** The composition of the predominant bacterial genera (n = 5/6).
