# Supplementary material for: Effects of oral milk extracellular vesicles on the gut microbiome and serum metabolome in mice
Source: Royal Society of Chemistry journal article supplement (doi:10.1039/d1fo02255e), 2021-01-01
Supplement: d1fo02255e2.xlsx [file d1fo02255e2.xlsx]

## Sheet: Female
ID	Metabolite	Metab ID	M/Z	Mode	Adducts	Formula	Retention time	VIP_pred_OPLS-DA	VIP_PLS-DA	FC(EVs/PBS)	P_value	FDR	EVs1	EVs2	EVs3	EVs4	EVs5	EVs6	PBS1	PBS2	PBS3	PBS4	PBS5	PBS6
pos_4	Taurodeoxycholic Acid	metab_3	464.281	pos	M+H-2H2O, M+2Na-H, M+NH4, M+Na, M+H, M+H-H2O	C26H45NO6S	6.14292	1.7081	1.7222	0.9086	0.001543	0.006997	4.1723	4.3223	4.581	4.5824	4.017	4.1038	4.7064	4.7483	4.7254	4.7221	4.6776	4.788
pos_8	PE(18:0/0:0)	metab_7	482.322	pos	M+H, M+Na, M+2Na-H, 2M+Na, 2M+H, M+H-H2O	C23H48NO7P	9.00025	1.87	1.8687	1.0739	3.163e-09	1.391e-06	6.0055	6.0821	6.0384	6.0413	6.0619	6.0438	5.648	5.6772	5.6006	5.6103	5.6813	5.5646
neg_12	12(R)-HETE	metab_6009	319.228	neg	M-H, 2M-H, M+Cl, M-H2O-H	C20H32O3	7.79783	1.5462	1.5315	0.9547	1.654e-05	0.0003265	6.3696	6.1993	6.2503	6.2641	6.2119	6.2472	6.6183	6.6251	6.6177	6.4817	6.4806	6.5023
pos_13	Pantothenic Acid	metab_12	220.117	pos	M+H, M+Na, M+K, 2M+Na, M+H-H2O, M+H-2H2O	C9H17NO5	1.5119	1.1062	1.1148	0.9697	0.0002725	0.002058	5.343	5.3595	5.3636	5.4214	5.3506	5.38	5.46	5.47	5.5074	5.6033	5.5581	5.6275
pos_20	Inosine	metab_19	291.068	pos	M+Na, M+K, M+2Na-H, 2M+Na, M+H	C10H12N4O5	1.0716	4.6269	4.576	2.3395	1.949e-05	0.0003609	3.7617	5.069	5.3567	5.4236	4.12	4.1726	2.2277	2.1502	1.4447	1.3162	2.4066	2.3818
pos_49	Retinoic acid	metab_48	301.215	pos	M+H, M+ACN+H, M+H-H2O, M+H-2H2O	C20H28O2	7.37593	1.5683	1.5625	0.9397	1.655e-06	6.878e-05	4.7068	4.6228	4.7057	4.7635	4.5675	4.663	4.9616	5.0018	4.9861	4.9429	4.946	4.9941
pos_55	Eicosapentaenoic Acid	metab_54	303.23	pos	M+H, 2M+H, M+H-H2O, M+H-2H2O	C20H30O2	7.78972	1.4472	1.4363	0.9555	2.3e-05	0.000405	5.7729	5.5817	5.64	5.6578	5.6047	5.6505	5.9489	5.9539	5.9695	5.832	5.8577	5.9236
neg_57	Deoxycholic acid	metab_6054	391.285	neg	M-H, M+FA-H, M+Cl	C24H40O4	7.48537	1.3778	1.3557	0.9429	0.006162	0.01925	5.1921	4.6955	4.7162	4.7436	4.7619	4.8373	5.0341	5.0552	5.0184	5.1973	5.1844	5.2078
neg_69	Hydroxyphenyllactic acid	metab_6066	181.05	neg	M-H, 2M-H, M-H2O-H	C9H10O4	1.81515	1.6167	1.6158	0.9411	2.903e-07	2.186e-05	5.0309	4.9915	5.0611	5.0897	5.021	5.0803	5.3059	5.3168	5.3215	5.4077	5.4111	5.4108
pos_115	Phenylacetylglycine	metab_114	194.08	pos	M+H, M+Na, M+H-H2O	C10H11NO3	2.48068	1.007	1.0097	0.962	0.005003	0.0165	4.0855	3.992	3.9705	4.0302	4.0028	4.0442	4.0615	4.1197	4.0888	4.2653	4.2542	4.2878
pos_149	LysoPA(0:0/18:1(9Z))	metab_148	419.254	pos	M+H-H2O, M+H, M+2Na-H	C21H41O7P	9.48293	1.0276	1.0284	0.9655	0.005101	0.01673	4.6998	4.5743	4.5929	4.6483	4.4832	4.5769	4.684	4.7143	4.6591	4.8186	4.8175	4.869
pos_211	PE(O-18:0/0:0)	metab_210	468.343	pos	M+H, M+Na, M+2Na-H	C23H50NO6P	9.28478	2.1566	2.1634	1.1249	7.173e-08	9.053e-06	5.1098	5.1269	5.0196	5.0315	5.0824	5.0602	4.5145	4.6347	4.4849	4.4924	4.5602	4.365
pos_235	PE(16:0/0:0)	metab_234	454.291	pos	M+H, M+Na, M+H-H2O	C21H44NO7P	8.3274	1.279	1.2685	1.0354	1.799e-05	0.0003434	5.9138	5.9523	5.9775	5.9598	6.0135	6.0043	5.7991	5.8117	5.7647	5.6823	5.7204	5.8171
neg_250	N-Acetyl-L-glutamic acid	metab_6247	188.056	neg	M-H2O-H, M-H	C7H11NO5	0.956117	1.7959	1.7961	0.9047	4.019e-06	0.0001286	3.7041	3.7829	3.8363	3.9317	3.7571	3.8254	4.1167	4.169	4.1592	4.315	4.2782	4.2028
pos_290	2-Hydroxycinnamic acid	metab_289	182.08	pos	M+H, M+NH4, M+H-H2O	C9H8O3	0.9847	1.2885	1.2919	0.9642	3.861e-06	0.0001261	5.5571	5.591	5.627	5.6519	5.5842	5.6325	5.7391	5.8074	5.8171	5.8545	5.8107	5.8589
neg_320	L-Tyrosine	metab_6317	180.066	neg	M-H, M+Na-2H	C9H11NO3	1.6624	1.801	1.7943	0.8887	3.783e-05	0.0005492	3.352	3.3135	3.3315	3.5157	3.1296	3.1983	3.7501	3.7722	3.7914	3.6809	3.6536	3.6803
neg_367	Aminohippuric acid	metab_6364	215.045	neg	M-H, M+Na-2H	C9H10N2O3	1.70675	1.2579	1.2426	1.081	0.005897	0.01867	3.1977	3.4925	3.0597	3.3907	3.2794	3.1252	3.0231	3.0917	2.9398	2.9932	2.9919	3.0427
pos_368	5-Methoxyindoleacetate	metab_367	247.106	pos	M+CH3OH+H, M+ACN+H	C11H11NO3	1.468	1.3592	1.3658	1.0719	0.0006494	0.003737	3.8252	3.8865	4.0906	3.9078	3.7587	3.8884	3.7344	3.664	3.6443	3.6417	3.5644	3.5458
neg_464	Uric acid	metab_6461	167.02	neg	M-H, M+Cl	C5H4N4O3	0.755617	1.2107	1.212	1.0297	5.431e-09	1.95e-06	6.0278	5.9946	6.0317	6.0397	6.0522	6.0426	5.8699	5.8516	5.837	5.8646	5.8663	5.8508
neg_469	N-Acetyl-D-phenylalanine	metab_6466	206.081	neg	M-H, 2M-H	C11H13NO3	2.94818	1.1361	1.1396	0.967	5.88e-05	0.0007349	4.8553	4.9343	4.9615	5.0147	4.9135	4.9968	5.0769	5.1052	5.1128	5.1272	5.1248	5.141
neg_486	Malic acid	metab_6483	133.013	neg	M-H, M-H2O-H	C4H6O5	0.7147	1.6127	1.6104	0.9463	1.318e-07	1.255e-05	5.5381	5.4759	5.5513	5.5823	5.441	5.4934	5.8066	5.8093	5.802	5.8508	5.8259	5.8655
pos_522	21-Deoxycortisol	metab_521	347.22	pos	M+H-H2O, M+H	C21H30O4	4.8402	1.8136	1.7978	0.8908	0.01882	0.04516	4.9116	4.7417	4.0432	4.0483	5.0349	5.123	5.0779	5.1287	5.1654	5.2921	5.289	5.3665
neg_546	PE-NMe(18:0/20:2(11Z,14Z))	metab_6543	830.591	neg	M+Cl, M+FA-H	C44H84NO8P	11.3229	1.9559	1.9424	0.9172	0.001255	0.006003	6.2864	6.2728	5.9247	5.6211	5.9746	5.8284	6.5499	6.6172	6.5174	6.5532	6.6684	6.2433
pos_578	Palmitoylcarnitine	metab_577	400.34	pos	M+H, M+Na	C23H45NO4	7.22182	1.4156	1.4026	0.9541	1.372e-05	0.0002932	5.269	5.0923	5.0977	5.1446	5.0973	5.1971	5.3593	5.3712	5.4267	5.3912	5.403	5.4392
pos_616	PE(17:0/0:0)	metab_615	468.306	pos	M+H, M+Na	C22H46NO7P	8.67462	1.6894	1.6836	1.0806	1.168e-08	3.317e-06	4.5672	4.5024	4.5336	4.5187	4.6128	4.5452	4.1934	4.2402	4.1845	4.1722	4.215	4.2445
neg_740	Taurocholic acid	metab_6737	514.284	neg	M-H, 2M-H	C26H45NO7S	4.48573	1.5931	1.5896	0.9512	1.079e-06	5.198e-05	6.0478	5.9414	6.0518	6.0611	5.9793	6.049	6.2693	6.28	6.3005	6.3821	6.3768	6.3782
pos_889	LysoPC(20:0/0:0)	metab_888	574.382	pos	M+Na, M+K	C28H58NO7P	9.46078	1.4935	1.5102	1.0511	1.234e-05	0.0002767	5.9655	5.9506	5.9088	5.8993	5.8552	5.9566	5.621	5.7035	5.5974	5.6471	5.7289	5.5133
neg_900	12,13-DHOME	metab_6897	335.223	neg	M+Na-2H, M+Cl	C18H34O4	6.91753	1.2878	1.2779	0.9565	1.295e-06	5.883e-05	4.3978	4.3345	4.408	4.4462	4.3493	4.4379	4.6106	4.6123	4.6047	4.5762	4.5889	4.5839
neg_921	Resolvin D5	metab_6918	341.212	neg	M-H2O-H, M+FA-H	C22H32O4	7.34985	1.7993	1.7884	0.8856	2.778e-05	0.0004547	3.332	3.0348	3.3047	3.2031	3.0193	3.1078	3.5697	3.589	3.6261	3.5486	3.5335	3.5914
neg_958	PS(18:1(11Z)/20:0)	metab_6955	838.56	neg	M-H, M+Na-2H	C44H84NO10P	7.82045	1.4249	1.4108	0.9514	0.0002522	0.001962	5.3965	5.1605	5.2301	5.3589	5.2375	5.2232	5.5648	5.6759	5.469	5.4681	5.537	5.5062
neg_959	PS(20:0/22:5(7Z,10Z,13Z,16Z,19Z))	metab_6956	910.56	neg	M+Na-2H, M+FA-H	C48H84NO10P	7.68808	1.6248	1.6131	0.9334	7.943e-05	0.0009	4.9473	4.6397	4.8087	4.8653	4.7041	4.7057	5.0354	5.1194	5.2168	5.1079	5.1445	5.0899
neg_982	LysoPC(22:5(4Z,7Z,10Z,13Z,16Z))	metab_6979	614.346	neg	M+Cl, M+FA-H	C30H52NO7P	8.12928	1.5513	1.5539	1.0571	4.791e-07	3.066e-05	5.4521	5.3627	5.4875	5.4671	5.3428	5.4099	5.1225	5.0848	5.1478	5.1299	5.129	5.1494
pos_1026	Sphingosine	metab_1025	282.278	pos	M+H-H2O, M+H	C18H37NO2	6.93548	1.5152	1.5183	1.0663	4.115e-05	0.0005783	4.768	4.86	4.6931	4.6709	4.825	4.8491	4.5157	4.5874	4.4961	4.4058	4.4208	4.4592
pos_1146	N-lactoyl-Methionine	metab_1145	222.078	pos	M+H-H2O, M+H	C8H15NO4S	2.02953	1.7772	1.7738	0.8999	7.185e-09	2.339e-06	3.4152	3.3207	3.3681	3.4335	3.3313	3.3579	3.7034	3.7448	3.7399	3.7421	3.7719	3.7746
pos_1149	3-Carbamoyl-2-phenylpropionic acid	metab_1148	192.065	pos	M+H-H2O, M+ACN+H	C10H11NO4	2.00748	1.3301	1.3308	0.9436	4.297e-05	0.0005928	3.8705	3.7933	3.8497	3.919	3.7519	3.7979	3.9661	4.081	4.0796	4.0739	4.0301	4.1229
neg_1167	PE-NMe(20:0/22:6(4Z,7Z,10Z,13Z,16Z,19Z))	metab_7164	878.591	neg	M+Cl, M+FA-H	C48H84NO8P	10.8739	1.4508	1.4407	0.9393	0.01174	0.03142	5.5977	5.6213	5.1861	4.9829	5.3743	5.2551	5.6846	5.722	5.7094	5.7001	5.8167	5.4545
pos_1261	Urocanic acid	metab_1260	139.05	pos	M+H-H2O, M+H	C6H6N2O2	0.71095	1.7442	1.7488	0.9212	1.694e-07	1.471e-05	4.2724	4.3125	4.2321	4.3934	4.3273	4.3277	4.6938	4.6794	4.699	4.6289	4.6317	4.7492
pos_1516	Hypoxanthine	metab_1515	137.045	pos	M+H	C5H4N4O	1.0716	3.4787	3.4413	1.5222	8.756e-05	0.0009618	3.7886	4.8724	5.1253	5.1614	4.0897	4.1068	2.9676	2.9658	2.9175	3.021	2.8886	3.0686
pos_1896	3-hydroxyoctanoyl carnitine	metab_1895	304.21	pos	M+H	C15H29NO5	2.79837	1.0288	1.0197	0.9581	0.001841	0.007966	3.6212	3.4543	3.4083	3.4679	3.4963	3.5459	3.5898	3.6108	3.6659	3.6398	3.6857	3.7184
neg_1925	Acetyl-L-tyrosine	metab_7922	222.076	neg	M-H	C11H13NO4	1.81515	1.3706	1.3656	0.9504	1.046e-06	5.107e-05	4.3291	4.3636	4.367	4.4174	4.3941	4.4709	4.5919	4.6002	4.6239	4.6455	4.6349	4.617
pos_2269	Nonadecanoic acid	metab_2268	316.319	pos	M+NH4	C19H38O2	6.53808	1.2082	1.2034	0.9577	0.006694	0.02047	5.4061	5.2121	5.0849	5.305	5.2896	5.0688	5.5987	5.3412	5.3508	5.4874	5.5305	5.4476
pos_2314	Sphinganine	metab_2313	302.304	pos	M+H	C18H39NO2	7.0887	2.2475	2.2438	1.2115	3.603e-05	0.0005326	3.7256	3.9531	3.5203	3.473	3.8003	3.7322	3.0903	3.2713	3.0364	2.8418	3.0491	3.0387
pos_2319	Spisulosine	metab_2318	286.309	pos	M+H	C18H39NO	7.13355	2.7408	2.7378	1.2649	2.428e-07	1.902e-05	4.4006	4.4297	4.2943	4.144	4.4531	4.2934	3.3601	3.6775	3.414	3.3062	3.4908	3.3169
pos_2377	9-OxoODE	metab_2376	295.225	pos	M+H	C18H30O3	7.63825	1.2079	1.2149	0.9533	0.0008537	0.004587	4.1843	4.2385	4.2381	4.2551	4.3134	4.372	4.3835	4.4089	4.4078	4.5572	4.5099	4.5858
neg_2558	Anthranilic acid	metab_8555	273.088	neg	2M-H	C7H7NO2	3.73742	2.2522	2.2517	1.1581	1.468e-09	9.094e-07	4.4471	4.3757	4.434	4.4669	4.3367	4.398	3.8322	3.8073	3.8842	3.7529	3.7486	3.8243
neg_3113	Tetradecanedioic acid	metab_9110	257.176	neg	M-H	C14H26O4	6.28083	1.3333	1.3449	0.9423	0.0001751	0.00154	3.7973	3.9003	4.0297	4.0504	3.9311	3.986	4.1564	4.134	4.1885	4.2104	4.2068	4.2479
neg_3189	Janthitrem B	metab_9186	630.341	neg	M+FA-H	C37H47NO5	6.62198	1.3128	1.3051	0.9493	9.445e-05	0.001019	4.2764	4.0882	4.183	4.2635	4.0958	4.1597	4.3654	4.3782	4.3657	4.4279	4.4295	4.4396
neg_3373	Vitamin A	metab_9370	331.228	neg	M+FA-H	C20H30O	7.59832	1.753	1.7398	0.8996	6.907e-08	8.881e-06	3.2613	3.241	3.284	3.2767	3.176	3.321	3.6701	3.6772	3.6137	3.616	3.5785	3.5893
pos_3472	LysoPC(P-16:0)	metab_3471	444.324	pos	M+H-2H2O	C24H50NO6P	10.5037	1.9336	1.9423	1.1167	4.242e-05	0.0005911	4.7669	4.7887	4.6364	4.5394	4.6054	4.6234	4.1677	4.0525	4.1139	4.2579	4.4137	4.0352
neg_3694	LysoPE(18:0/0:0)	metab_9691	462.299	neg	M-H2O-H	C23H48NO7P	8.72728	1.1443	1.1279	0.9682	4.378e-05	0.0006016	5.0912	4.9727	4.9533	4.953	4.9588	5.0171	5.1312	5.1407	5.155	5.1862	5.1744	5.1446
pos_3727	LysoPC(20:0)	metab_3726	552.4	pos	M+H	C28H58NO7P	9.46078	1.3043	1.3213	1.0425	0.0001057	0.001096	5.6773	5.6809	5.6393	5.61	5.6013	5.6662	5.4047	5.4616	5.3689	5.4522	5.5265	5.2831
neg_3737	LysoPA(0:0/18:2(9Z,12Z))	metab_9734	433.236	neg	M-H	C21H39O7P	8.83888	1.1569	1.1489	0.9697	0.0003935	0.002611	5.9227	5.7513	5.8193	5.8256	5.7164	5.7774	5.9079	5.9735	5.9596	6.0218	6.0134	6.0202
pos_3806	LysoPE(0:0/22:0)	metab_3805	502.36	pos	M+H-2H2O	C27H56NO7P	9.13197	1.0775	1.0677	1.0585	0.02858	0.06281	3.9033	3.8122	3.7277	3.9142	3.8213	3.8531	3.6509	3.7786	3.6459	3.2491	3.7065	3.7281
pos_3870	Palmitic amide	metab_3869	256.262	pos	M+H	C16H33NO	8.91413	1.451	1.4413	1.0899	0.01451	0.03692	4.0552	4.4244	4.0962	4.1407	4.5796	4.7298	3.9544	3.9053	3.9214	4.0142	3.9349	4.1527
pos_3904	DIOSGENIN	metab_3903	415.319	pos	M+H	C27H42O3	8.71957	1.8972	1.8925	0.8936	0.0001066	0.0011	4.0227	3.9347	3.7152	3.7867	4.1435	4.125	4.3631	4.4013	4.3622	4.4461	4.4567	4.5287
pos_3923	PE(O-16:0/0:0)	metab_3922	440.312	pos	M+H	C21H46NO6P	8.65408	1.3924	1.3842	1.0535	2.143e-06	8.228e-05	4.6882	4.6525	4.6677	4.645	4.6934	4.6772	4.4316	4.4838	4.426	4.3786	4.3709	4.5143
neg_3972	Prostaglandin G2 2-glyceryl Ester	metab_9969	477.223	neg	M+Cl	C23H38O8	9.35017	1.5806	1.5739	0.9319	6.823e-07	3.843e-05	4.2386	4.0949	4.1244	4.1929	4.1038	4.1168	4.4327	4.4079	4.4148	4.4905	4.4524	4.488
pos_4053	(25S)-5beta-spirostan-3beta-ol	metab_4052	417.334	pos	M+H	C27H44O3	8.02943	2.0414	2.0302	0.8415	0.01584	0.03946	3.9927	3.9374	3.1137	3.0655	4.2682	4.3371	4.3271	4.2469	4.3262	4.6802	4.6889	4.7266
neg_4133	CPA(18:2(9Z,12Z)/0:0)	metab_10129	415.226	neg	M-H	C21H37O6P	9.72762	2.0558	2.0672	0.8982	8.89e-06	0.0002187	4.5935	4.73	4.8638	4.8796	4.6301	4.682	5.1721	5.1661	5.1736	5.3728	5.3484	5.3653
pos_4273	12-OPDA	metab_4272	293.21	pos	M+H	C18H28O3	7.13355	1.0007	1.018	0.9589	0.004194	0.01447	3.6302	3.6979	3.7346	3.7555	3.6861	3.7597	3.7745	3.7654	3.836	3.9038	3.9447	3.996
neg_4335	CPA(16:0/0:0)	metab_10331	391.225	neg	M-H	C19H37O6P	11.0541	1.9736	1.9862	0.9072	9.057e-06	0.0002214	4.7187	4.8117	4.9614	4.9901	4.8063	4.8139	5.2562	5.2378	5.2601	5.4434	5.4217	5.4559
neg_4341	PE(18:2(9Z,12Z)/20:0)	metab_10337	816.576	neg	M+FA-H	C43H82NO8P	11.0541	1.6474	1.6307	0.9141	0.0112	0.03029	5.107	4.9778	4.5416	4.2605	4.7169	4.5364	5.1338	5.1807	5.1332	5.1734	5.3195	4.8483
neg_4345	PE-NMe(18:0/22:4(7Z,10Z,13Z,16Z))	metab_10341	854.591	neg	M+FA-H	C46H84NO8P	11.0988	1.5985	1.5852	0.9323	0.00788	0.02306	5.8749	5.8547	5.4203	5.1967	5.5917	5.4596	5.9886	6.032	5.9785	5.9788	6.1315	5.7104
neg_4367	CPA(18:1(11Z)/0:0)	metab_10363	417.241	neg	M-H	C21H39O6P	11.3457	1.9736	1.9881	0.8913	3.58e-05	0.0005304	4.0233	4.1131	4.3131	4.3196	4.0921	4.1365	4.5762	4.5407	4.5592	4.7848	4.7679	4.8161
neg_4433	CPA(18:0/0:0)	metab_10429	419.257	neg	M-H	C21H41O6P	13.2545	1.828	1.83	0.9079	3.96e-05	0.0005655	4.1591	4.3217	4.3747	4.3034	4.2038	4.1911	4.6161	4.644	4.5863	4.8155	4.8814	4.5999
pos_4552	TXB2	metab_4551	393.223	pos	M+Na	C20H34O6	5.46205	1.7172	1.718	0.8578	0.02587	0.05809	3.1656	3.6901	3.0843	3.3567	2.9226	3.1025	3.9793	4.1796	4.2313	3.3656	3.42	3.3479
pos_4565	Taurohyocholic Acid	metab_4564	538.279	pos	M+Na	C26H45NO7S	5.37347	1.6179	1.6281	0.9288	3.738e-05	0.0005443	4.3341	4.4695	4.5621	4.5733	4.3202	4.4145	4.7637	4.7705	4.7581	4.8091	4.7442	4.8757
pos_4579	5,6-epoxy-18R-HEPE	metab_4578	333.204	pos	M+H	C20H28O4	5.30737	2.3001	2.2877	0.853	3.163e-05	0.0004965	4.1139	3.7911	3.677	3.7381	4.0043	4.077	4.4415	4.4849	4.4397	4.6853	4.6297	4.7506
pos_4625	Chavicol	metab_4624	135.08	pos	M+H	C9H10O	5.0409	1.0474	1.0592	0.9458	0.009961	0.02768	3.0874	3.0583	3.2998	3.3809	3.2552	3.2888	3.3723	3.3964	3.4175	3.4485	3.3302	3.5151
pos_4669	Cortisol	metab_4668	363.215	pos	M+H	C21H30O5	4.66305	1.603	1.5818	0.89	0.03754	0.07806	4.3395	3.9153	3.3646	3.3031	4.2582	4.3147	4.2547	4.3019	4.2877	4.4898	4.4937	4.5735
pos_4673	Hydrocortisone	metab_4672	345.204	pos	M+H-H2O	C21H30O5	4.64082	2.126	2.116	0.8467	0.0006306	0.003662	3.6344	3.4285	3.11	3.1322	3.6884	3.7101	3.925	3.9332	3.9591	4.197	4.1944	4.2465
pos_4695	Sulfolithocholylglycine	metab_4694	496.271	pos	M+H-H2O	C26H43NO7S	4.4837	1.3253	1.3155	0.9466	0.0003267	0.002304	4.2556	4.1348	4.0716	4.1287	4.2264	4.2933	4.3517	4.359	4.3804	4.489	4.4483	4.4974
pos_4766	Glycitein	metab_4765	285.074	pos	M+H	C16H12O5	3.92382	1.4485	1.4492	0.9253	0.001542	0.006996	3.9627	3.6698	3.7687	3.8359	3.6446	3.7082	3.9118	3.9711	4.0015	4.1495	4.1482	4.2343
pos_4951	Baicalin	metab_4950	447.09	pos	M+H	C21H18O11	2.88857	1.2001	1.214	0.9517	0.002043	0.008589	4.2021	4.2453	4.3775	4.4708	4.1559	4.2285	4.4348	4.4704	4.4874	4.4994	4.5112	4.5785
pos_5680	Xanthine	metab_5679	153.04	pos	M+H	C5H4N4O2	0.7941	3.9462	3.9304	1.6117	1.46e-07	1.326e-05	4.3218	5.0327	5.0951	5.2173	4.9822	4.8356	2.9907	3.1447	2.9528	3.33	2.9436	2.9339
neg_5740	7Z, 10Z, 13Z, 16Z, 19Z-docosapentaenoic acid	metab_11736	329.249	neg	M-H	C22H34O2	9.26012	1.0794	1.0992	1.0573	0.005853	0.01858	3.6846	3.4393	3.4646	3.5575	3.4612	3.5259	3.3668	3.3973	3.4706	3.2037	3.2928	3.2537
pos_5807	L-Proline	metab_5806	116.07	pos	M+H	C5H9NO2	0.629033	1.056	1.0692	0.9697	0.001015	0.005183	5.2135	5.2066	5.2844	5.3011	5.1353	5.1233	5.3208	5.3545	5.3394	5.3882	5.3852	5.4533
neg_6050	Tetracosatetraenoic acid (24:4n-6)	metab_12045	405.301	neg	M+FA-H	C24H40O2	8.72728	2.5802	2.6082	1.2699	0.0003838	0.002571	4.2302	4.421	4.5022	4.4866	4.2342	4.2954	3.184	3.5741	3.2185	3.882	3.8898	2.8618
neg_6108	LysoPE(20:2(11Z,14Z)/0:0)	metab_12103	504.31	neg	M-H	C25H48NO7P	8.59433	1.0581	1.0544	1.032	0.0001719	0.001526	4.7234	4.7383	4.7525	4.7666	4.7151	4.7401	4.5534	4.5091	4.5577	4.647	4.6382	4.6459
neg_6185	LysoPE(22:4(7Z,10Z,13Z,16Z)/0:0)	metab_12180	528.309	neg	M-H	C27H48NO7P	8.41653	1.103	1.0949	1.0316	2.221e-06	8.385e-05	4.7724	4.8194	4.8756	4.8395	4.8391	4.8389	4.6574	4.6814	4.706	4.6851	4.6762	4.6912
neg_6194	Oleic acid	metab_12189	327.254	neg	M+FA-H	C18H34O2	8.39375	1.4819	1.4703	0.9292	1.209e-06	5.605e-05	3.4251	3.4357	3.4789	3.5013	3.4461	3.5668	3.7447	3.7848	3.7749	3.7282	3.7184	3.6949
neg_6207	LysoPC(22:4(7Z,10Z,13Z,16Z))	metab_12202	616.362	neg	M+FA-H	C30H54NO7P	8.3278	1.1987	1.2058	1.0373	1.955e-06	7.685e-05	4.93	4.9271	4.9478	4.9981	4.9136	5.0029	4.7586	4.7426	4.8075	4.7856	4.7871	4.7677
neg_6236	2-hydroxy-6-pentadecylbenzoic acid	metab_12231	347.259	neg	M-H	C22H36O3	8.23932	1.8069	1.7928	0.9178	1.533e-06	6.492e-05	4.5362	4.3261	4.4488	4.4755	4.3043	4.3683	4.8256	4.8358	4.8305	4.776	4.8034	4.7602
neg_6275	12alpha-hydroxy-3-oxo-5beta-cholan-24-oic Acid	metab_12270	371.259	neg	M-H2O-H	C24H38O4	8.12928	1.5895	1.572	0.9123	9.669e-05	0.001034	3.5981	3.2737	3.4274	3.4105	3.2684	3.3134	3.7207	3.7306	3.7182	3.7099	3.667	3.6954
neg_6359	Allylestrenol	metab_12354	345.243	neg	M+FA-H	C21H32O	7.88517	1.7191	1.7144	0.93	1.272e-08	3.456e-06	4.6922	4.5971	4.7078	4.7207	4.6202	4.6453	5.0037	5.019	5.0351	5.0118	5.0052	5.0147
neg_6374	PS(20:4(8Z,11Z,14Z,17Z)/22:2(13Z,16Z))	metab_12369	862.56	neg	M-H	C48H82NO10P	7.79783	1.3667	1.3542	0.9605	5.884e-05	0.0007349	5.8969	5.7187	5.7426	5.8038	5.7898	5.8053	6.0543	6.0915	6.1041	5.9478	5.9797	6.0087
neg_6383	Cortolone	metab_12378	387.215	neg	M+Na-2H	C21H34O5	7.79783	1.2064	1.2049	0.9599	0.001159	0.005693	5.0789	4.9599	4.8551	4.8418	4.986	4.8784	5.2031	5.2147	5.1647	5.0581	5.1003	5.0927
neg_6454	PE-NMe2(18:1(11Z)/16:1(9Z))	metab_12449	788.545	neg	M+FA-H	C41H78NO8P	7.59832	1.3476	1.3534	0.9412	0.001478	0.006784	4.1605	4.1975	4.1806	4.2853	4.2887	4.329	4.4021	4.4097	4.3475	4.6505	4.6129	4.609
neg_6795	5b-Cyprinol sulfate	metab_12790	531.299	neg	M-H	C27H48O8S	6.34935	1.6651	1.6544	0.9182	3.52e-06	0.0001179	3.9705	3.7353	3.8467	3.8238	3.7317	3.7816	4.1292	4.1618	4.147	4.1442	4.1679	4.1779
neg_6886	Frangulanine	metab_12881	537.289	neg	M+K-2H	C28H44N4O4	6.0769	1.2664	1.2454	1.0722	0.02019	0.04777	3.6267	4.1571	4.1729	4.2483	4.2015	4.2808	3.7821	3.8503	3.8341	3.8677	3.8553	3.8408
neg_7138	Traumatic Acid	metab_13133	227.128	neg	M-H	C12H20O4	5.19073	1.1885	1.1947	0.9549	0.001264	0.006031	4.1455	4.3331	4.4106	4.416	4.3853	4.4631	4.5753	4.5851	4.5614	4.5512	4.5542	4.5606
neg_7206	Imidazoleacetic acid ribotide	metab_13201	373.021	neg	M+Cl	C10H15N2O9P	4.89518	2.6599	2.6536	1.6334	0.01165	0.03121	1.9629	3.6229	2.29	2.4005	3.9582	4.0538	1.825	1.9981	1.8127	2.0234	1.8501	1.6854
neg_7383	Taurocholic acid 3-sulfate	metab_13378	296.617	neg	M-2H	C26H45NO10S2	4.23557	1.1251	1.1424	0.9292	0.01786	0.04337	2.9168	3.0321	3.2106	3.2578	2.8	2.8128	3.1913	3.2305	3.2541	3.2246	3.2463	3.2581
neg_7686	N-acetylphenylalanine	metab_13681	206.081	neg	M-H	C11H13NO3	3.15045	1.1756	1.1659	0.9594	0.0008491	0.004569	4.4623	4.462	4.4774	4.4862	4.5706	4.6349	4.7419	4.7858	4.7816	4.6317	4.6492	4.6541
neg_7816	Salicyluric acid	metab_13811	194.045	neg	M-H	C9H9NO4	2.76865	1.3822	1.3798	0.9254	0.0001811	0.001576	3.1598	3.1469	3.2375	3.2418	2.9672	3.146	3.3424	3.3735	3.3945	3.431	3.4525	3.4287
neg_7826	L-Hypoglycin A	metab_13821	186.076	neg	M+FA-H	C7H11NO2	2.74678	1.5797	1.5699	1.0874	9.423e-05	0.001019	4.015	4.0336	4.1301	4.1596	3.8707	3.9056	3.6368	3.6468	3.6887	3.7179	3.7159	3.7719
neg_8116	2-Isopropylmalic acid	metab_14111	175.06	neg	M-H	C7H12O5	2.12457	1.4461	1.4325	0.9224	0.0002359	0.001865	3.4232	3.1983	3.3263	3.4013	3.143	3.1942	3.5448	3.565	3.5609	3.6052	3.5329	3.5358
neg_8129	Prenyl glucoside	metab_14124	293.124	neg	M+FA-H	C11H20O6	2.07943	1.2989	1.3035	0.9481	0.000198	0.001662	4.0085	4.1153	4.2379	4.2411	4.084	4.188	4.3144	4.3858	4.3821	4.406	4.3694	4.3824
neg_8269	Xanthurenic acid	metab_14264	204.029	neg	M-H	C10H7NO4	1.7932	1.3755	1.3651	0.9413	7.477e-05	0.0008637	3.839	3.8555	3.8557	3.8769	3.9265	4.0087	4.1729	4.1991	4.2161	4.0857	4.06	4.088
neg_8316	D-(+)-Malic acid	metab_14311	133.013	neg	M-H	C4H6O5	1.75025	1.5436	1.5379	0.9203	4.446e-07	2.914e-05	3.3738	3.2637	3.3058	3.3748	3.2974	3.3297	3.5867	3.5665	3.5791	3.6702	3.6132	3.6558
neg_8335	Hippurate	metab_14330	224.056	neg	M+FA-H	C9H9NO3	1.72877	1.0574	1.0701	0.9552	0.005865	0.01861	3.738	3.7964	3.9246	4.0422	3.7315	3.791	3.9599	3.996	4.0273	4.0284	4.0449	4.0485
neg_8339	Adipic acid	metab_14334	145.049	neg	M-H	C6H10O4	1.72877	1.1619	1.1527	0.9548	0.0002558	0.001985	3.7174	3.7514	3.7903	3.8399	3.7705	3.8145	4.0524	3.9907	3.901	4.005	3.88	3.933
neg_8482	Allysine	metab_14477	144.065	neg	M-H	C6H11NO3	1.52772	1.178	1.1811	0.9624	4.761e-05	0.0006406	4.5239	4.6117	4.6426	4.6761	4.631	4.7016	4.7722	4.8192	4.8089	4.813	4.8274	4.829
neg_8780	Ascorbic acid-2-sulfate	metab_14775	254.981	neg	M-H	C6H8O9S	0.7754	1.5129	1.5123	0.9481	6.431e-07	3.73e-05	5.0511	5.0238	5.0833	5.1599	5.1233	5.1626	5.3673	5.3498	5.3838	5.3665	5.3987	5.4128
neg_8815	Oxoglutaric acid	metab_14810	145.013	neg	M-H	C5H6O5	0.755617	1.2287	1.239	0.9596	1.5e-05	0.0003074	4.5101	4.635	4.6701	4.6539	4.5833	4.6016	4.7875	4.7904	4.7827	4.8119	4.8192	4.8288
neg_9014	L-Glutamate	metab_15009	146.045	neg	M-H	C5H9NO4	0.597183	1.1602	1.1551	0.966	5.108e-06	0.000153	4.7809	4.6938	4.728	4.713	4.6908	4.678	4.9156	4.8966	4.8955	4.8534	4.8441	4.8761

## Sheet: Male
ID	Metabolite	Metab ID	M/Z	Mode	Adducts	Formula	Retention time	VIP_pred_OPLS-DA	VIP_PLS-DA	FC(EVs/PBS)	P_value	FDR	EVs1	EVs2	EVs3	EVs4	EVs5	EVs6	PBS1	PBS2	PBS3	PBS4	PBS5	PBS6
pos_4	Taurodeoxycholic Acid	metab_3	464.281	pos	M+H-2H2O, M+2Na-H, M+NH4, M+Na, M+H, M+H-H2O	C26H45NO6S	6.14292	2.6841	2.4302	1.1372	0.007616	0.1542	3.9442	3.5894	3.8762	3.8309	4.558	4.1779	3.4176	3.7093	3.5397	3.4705	3.5663	3.3792
neg_12	12(R)-HETE	metab_6009	319.228	neg	M-H, 2M-H, M+Cl, M-H2O-H	C20H32O3	7.79783	1.9656	1.7585	0.9681	0.000121	0.03763	6.3512	6.3161	6.2143	6.2925	6.2539	6.2809	6.4346	6.5178	6.6004	6.5245	6.4134	6.4635
pos_20	Inosine	metab_19	291.068	pos	M+Na, M+K, M+2Na-H, 2M+Na, M+H	C10H12N4O5	1.0716	4.0761	3.9394	1.788	6.496e-05	0.02856	2.1481	1.9154	2.3226	2.5145	2.3262	1.8276	1.1084	1.1181	1.7123	1.1235	1.1182	1.1235
pos_28	Proline betaine	metab_27	144.101	pos	M+Na, M+K, 2M+Na, M+H	C7H13NO2	0.629033	1.325	1.2728	1.0254	0.022	0.2224	5.4054	5.4651	5.6359	5.664	5.6586	5.5357	5.4103	5.4986	5.3166	5.4302	5.4514	5.4297
pos_32	L-Valine	metab_31	118.086	pos	M+H, 2M+H, M+Na, 2M+Na	C5H11NO2	0.610183	1.2666	1.1151	1.0165	0.004947	0.1392	6.0171	6.0764	6.0645	6.0798	6.1658	6.0856	5.9392	5.9135	5.9855	6.0204	6.0056	6.0327
pos_49	Retinoic acid	metab_48	301.215	pos	M+H, M+ACN+H, M+H-H2O, M+H-2H2O	C20H28O2	7.37593	1.7474	1.6298	0.9574	0.009597	0.1715	4.9195	4.8143	4.5868	4.6165	4.6101	4.7506	4.8337	4.9305	5.0594	5.0004	4.8433	4.8916
pos_55	Eicosapentaenoic Acid	metab_54	303.23	pos	M+H, 2M+H, M+H-H2O, M+H-2H2O	C20H30O2	7.78972	1.5772	1.44	0.9751	0.0006731	0.08266	5.838	5.8456	5.7169	5.7741	5.7821	5.8202	5.8727	5.9558	6.0316	5.9506	5.8908	5.9607
neg_367	Aminohippuric acid	metab_6364	215.045	neg	M-H, M+Na-2H	C9H10N2O3	1.70675	2.0013	1.851	1.086	0.00775	0.1553	3.5667	3.3708	3.627	3.5615	3.6242	3.6225	3.437	3.4059	3.0114	3.2877	3.4357	3.1044
neg_469	N-Acetyl-D-phenylalanine	metab_6466	206.081	neg	M-H, 2M-H	C11H13NO3	2.94818	1.4863	1.3979	1.0409	0.03313	0.2597	4.5519	4.6695	4.7378	4.9296	4.9834	4.8106	4.5584	4.5593	4.7604	4.5348	4.5027	4.6368
pos_475	N-Acetyl-L-phenylalanine	metab_474	208.096	pos	M+H, M+Na	C11H13NO3	2.95612	1.5228	1.4299	1.0507	0.02583	0.2327	3.7331	3.8206	3.9199	4.0971	4.1369	3.9224	3.7149	3.7099	3.9114	3.6785	3.6953	3.778
pos_578	Palmitoylcarnitine	metab_577	400.34	pos	M+H, M+Na	C23H45NO4	7.22182	1.8987	1.7205	0.9603	0.001301	0.102	5.3727	5.3038	5.1007	5.1546	5.1299	5.301	5.4474	5.4867	5.4583	5.4824	5.3899	5.3958
pos_889	LysoPC(20:0/0:0)	metab_888	574.382	pos	M+Na, M+K	C28H58NO7P	9.46078	1.2191	1.1331	0.9817	0.0212	0.2197	6.3049	6.3193	6.1674	6.1611	6.2054	6.2692	6.4269	6.3785	6.237	6.4185	6.3825	6.2795
neg_900	12,13-DHOME	metab_6897	335.223	neg	M+Na-2H, M+Cl	C18H34O4	6.91753	1.8536	1.6137	0.9588	0.0007131	0.0831	4.3589	4.3354	4.2587	4.3979	4.2412	4.26	4.4394	4.5309	4.5545	4.5784	4.4496	4.4113
neg_916	Hepoxilin B3	metab_6913	335.223	neg	M-H, M+Cl	C20H32O4	7.23602	1.3322	1.1827	0.9777	0.005523	0.1415	4.8915	4.9524	4.7918	4.8623	4.827	4.8461	4.9518	4.9903	5.0289	5.0331	4.9415	4.8945
neg_921	Resolvin D5	metab_6918	341.212	neg	M-H2O-H, M+FA-H	C22H32O4	7.34985	2.5555	2.4026	0.875	0.01228	0.1833	3.6584	3.7678	2.9493	3.0859	2.965	3.4778	3.6829	3.8084	3.9908	3.8373	3.6944	3.7338
neg_958	PS(18:1(11Z)/20:0)	metab_6955	838.56	neg	M-H, M+Na-2H	C44H84NO10P	7.82045	2.0338	1.8647	0.9581	0.000143	0.03898	5.3142	5.4002	5.2776	5.253	5.3039	5.3045	5.4769	5.5117	5.6823	5.5941	5.5074	5.4743
neg_959	PS(20:0/22:5(7Z,10Z,13Z,16Z,19Z))	metab_6956	910.56	neg	M+Na-2H, M+FA-H	C48H84NO10P	7.68808	1.8665	1.7883	0.9489	0.01737	0.2074	5.1968	5.107	4.7138	4.751	4.751	4.9885	5.0724	5.1114	5.3159	5.2759	5.1532	5.1707
pos_1016	Octadecenoylcarnitine	metab_1015	426.356	pos	M+H, M+Na	C25H47NO4	7.33157	1.474	1.4519	0.966	0.04164	0.2754	5.3506	5.2312	4.9434	4.9825	4.9859	5.1746	5.1897	5.3358	5.4246	5.3429	5.2337	5.2191
pos_1038	3-ketosphingosine	metab_1037	280.262	pos	M+H-H2O, M+H	C18H35NO2	6.4491	1.4802	1.4131	0.9641	0.004315	0.1387	4.0628	4.1706	3.9937	4.0027	4.0028	4.0686	4.224	4.1642	4.0848	4.2934	4.2605	4.1789
pos_1065	11beta-PGF2alpha	metab_1064	377.228	pos	M+NH4, M+Na	C20H34O5	5.92272	2.4352	2.0908	0.9064	0.01164	0.1791	3.7363	3.5568	3.4237	3.8639	3.3833	3.7015	3.7279	4.365	4.12	3.9771	3.8225	3.8939
neg_1115	LysoPC(O-18:0)	metab_7112	554.383	neg	M+Cl, M+FA-H	C26H56NO6P	9.19295	1.1764	1.0657	0.9847	0.0008721	0.09144	4.9656	4.9818	4.9582	4.9746	4.934	4.9793	5.0809	5.0723	5.004	5.07	5.034	4.9978
neg_1144	PE-NMe(16:0/20:3(5Z,8Z,11Z))	metab_7141	800.545	neg	M+Cl, M+FA-H	C42H78NO8P	10.3764	1.3668	1.2055	1.0177	0.001919	0.1113	5.82	5.8524	5.8051	5.7357	5.8393	5.857	5.7002	5.664	5.7169	5.6943	5.7652	5.7592
pos_1149	3-Carbamoyl-2-phenylpropionic acid	metab_1148	192.065	pos	M+H-H2O, M+ACN+H	C10H11NO4	2.00748	1.8757	1.7036	0.9428	0.002145	0.1124	3.7428	3.6524	3.4245	3.5537	3.5942	3.6063	3.8886	3.8163	3.9094	3.7451	3.7151	3.8104
neg_1161	PE-NMe(16:0/22:4(7Z,10Z,13Z,16Z))	metab_7158	826.561	neg	M+Cl, M+FA-H	C44H80NO8P	10.6242	1.1839	1.0247	1.0127	0.005543	0.1417	6.5038	6.6171	6.5722	6.5305	6.5498	6.6009	6.4404	6.4545	6.4729	6.4575	6.5247	6.5299
pos_1459	(R)-3-hydroxybutyrylcarnitine	metab_1458	248.148	pos	M+H	C11H21NO5	0.774317	1.1105	1.0346	0.9792	0.03963	0.2712	5.0134	4.834	4.9166	4.9699	4.958	4.9084	4.9408	4.961	5.133	5.001	5.0368	5.1551
pos_1707	N-Hydroxy-L-tyrosine	metab_1706	230.101	pos	M+CH3OH+H	C9H11NO4	1.96297	1.3769	1.2384	0.9579	0.03173	0.2562	3.2619	3.4598	3.1162	3.3726	3.2932	3.2872	3.3998	3.5327	3.3764	3.5462	3.4556	3.3471
pos_1896	3-hydroxyoctanoyl carnitine	metab_1895	304.21	pos	M+H	C15H29NO5	2.79837	1.8996	1.7707	0.936	0.006802	0.1482	3.8666	3.7201	3.5604	3.4867	3.4953	3.7285	3.756	3.8499	3.9569	4.031	3.8638	3.8929
neg_1925	Acetyl-L-tyrosine	metab_7922	222.077	neg	M-H	C11H13NO4	1.81515	1.7776	1.6032	1.0499	0.00618	0.1436	4.2233	4.3798	4.2469	4.4578	4.5175	4.446	4.1746	4.2723	4.0521	4.1008	4.2555	4.1722
neg_2724	Undecylenic acid	metab_8721	229.144	neg	M+FA-H	C11H20O2	4.48573	1.5614	1.4772	1.058	0.01955	0.2144	3.2635	3.5691	3.5349	3.6777	3.5797	3.5057	3.375	3.466	3.1751	3.3437	3.3355	3.2795
neg_3253	Linoelaidyl carnitine	metab_9250	468.333	neg	M+FA-H	C25H45NO4	6.96323	1.9843	1.8319	0.9342	0.004621	0.1392	3.9066	3.8298	3.548	3.5793	3.502	3.7105	3.8611	3.9999	3.9625	4.0077	3.8953	3.9011
neg_3373	Vitamin A	metab_9370	331.228	neg	M+FA-H	C20H30O	7.59832	2.2301	2.1119	0.8999	0.0176	0.2075	3.6938	3.628	3.1076	3.1196	3.012	3.4591	3.5552	3.6915	3.7932	3.9128	3.6582	3.636
pos_3496	PC(16:1(9Z)/20:4(8Z,11Z,14Z,17Z))	metab_3495	802.532	pos	M+Na	C44H78NO8P	10.3478	1.0041	0.8948	1.0102	0.00236	0.1151	5.8474	5.8537	5.8637	5.8318	5.8745	5.8867	5.8234	5.7912	5.8219	5.7442	5.8119	5.8107
neg_3516	LysoPC(P-18:1(9Z))	metab_9513	550.352	neg	M+FA-H	C26H52NO6P	8.12928	1.4162	1.2333	0.9757	0.003871	0.1353	4.8046	4.7344	4.7356	4.7894	4.6805	4.6667	4.8766	4.9192	4.8036	4.9042	4.8006	4.8132
pos_3547	PC(14:0/22:6(4Z,7Z,10Z,13Z,16Z,19Z))	metab_3546	800.516	pos	M+Na	C44H76NO8P	10.1026	1.006	0.8797	1.0154	0.02885	0.2469	4.6704	4.6811	4.6612	4.6214	4.7423	4.7369	4.599	4.6076	4.6756	4.5442	4.6681	4.5949
neg_3694	LysoPE(18:0/0:0)	metab_9691	462.299	neg	M-H2O-H	C23H48NO7P	8.72728	1.3796	1.1988	0.9759	0.01278	0.1865	5.0703	4.8981	4.8608	5.0779	5.0153	4.9748	5.0373	5.1416	5.162	5.1188	5.0939	5.0833
neg_3737	LysoPA(0:0/18:2(9Z,12Z))	metab_9734	433.236	neg	M-H	C21H39O7P	8.83888	1.2931	1.0993	0.983	0.007114	0.1496	5.8062	5.64	5.7014	5.7402	5.6892	5.7068	5.8314	5.8377	5.8371	5.8592	5.756	5.7551
neg_3829	Tetrahydrocorticosterone	metab_9826	371.22	neg	M+Na-2H	C21H34O4	9.05837	1.4037	1.2322	0.9674	0.01335	0.1887	3.9119	3.9299	3.7504	3.8412	3.7552	3.8128	3.9891	4.0526	3.9606	4.0218	3.8754	3.8787
pos_3890	Palmitoyl Ethanolamide	metab_3889	300.288	pos	M+H	C18H37NO2	8.80682	1.0139	0.8926	0.9844	0.006941	0.1492	4.1705	4.0911	4.1066	4.0927	4.057	4.0731	4.1777	4.1688	4.1892	4.1715	4.1486	4.12
pos_3932	O-Arachidonoyl Glycidol	metab_3931	361.272	pos	M+H	C23H36O3	8.6099	1.0262	0.902	0.9842	0.03789	0.267	4.9269	4.7499	4.8063	4.8223	4.7368	4.7893	4.8793	4.9259	4.9338	4.8477	4.8493	4.8545
pos_4069	Arachidonic Acid (peroxide free)	metab_4068	305.246	pos	M+H	C20H32O2	7.98493	2.2032	2.036	0.9299	0.003302	0.1299	4.3833	4.3524	4.009	4.0059	4.0491	4.2624	4.3777	4.5251	4.6108	4.5916	4.4015	4.4469
pos_4252	Hepoxilin A3	metab_4251	359.217	pos	M+Na	C20H32O4	7.22182	1.246	1.0782	0.9784	0.007676	0.1547	4.2921	4.3394	4.2448	4.347	4.3046	4.3257	4.3587	4.4324	4.4541	4.4812	4.3595	4.339
pos_4324	3-hydroxyhexadecanoyl carnitine	metab_4323	398.325	pos	M+H-H2O	C23H45NO5	6.75893	1.8396	1.7402	0.9482	0.01907	0.2124	4.9024	4.6169	4.4247	4.451	4.4365	4.6494	4.6522	4.8509	4.9845	4.9235	4.7745	4.7948
pos_4345	(±)-Myristoylcarnitine	metab_4344	372.309	pos	M+H	C21H41NO4	6.58193	2.1592	1.9529	0.9443	0.00106	0.09671	4.8868	4.6934	4.5694	4.6084	4.5317	4.7066	4.8496	4.939	5.0404	5.0127	4.8811	4.9207
pos_4414	3-hydroxytetradecanoyl carnitine	metab_4413	370.293	pos	M+H-H2O	C21H41NO5	6.209	1.5902	1.52	0.9588	0.03996	0.2717	5.0115	4.6726	4.5912	4.6061	4.599	4.7563	4.7125	4.9115	5.0819	5.0226	4.8258	4.8952
pos_4552	TXB2	metab_4551	393.223	pos	M+Na	C20H34O6	5.46205	1.6313	1.4098	0.939	0.03992	0.2717	3.1475	2.961	2.726	3.1543	3.1396	3.1482	3.1654	3.2605	3.4458	3.2597	3.1471	3.1862
pos_4565	Taurohyocholic Acid	metab_4564	538.279	pos	M+Na	C26H45NO7S	5.37347	2.1215	1.9128	1.0981	0.04593	0.285	4.1711	3.6361	4.0403	4.0229	4.7292	4.4558	3.602	4.0069	3.836	3.7724	3.8092	3.7944
neg_5121	PI(18:0/20:4(5Z,8Z,11Z,14Z))	metab_11117	885.55	neg	M-H	C47H83O13P	13.2102	2.7416	2.8925	1.1408	0.01889	0.2118	5.3252	5.2298	5.186	6.2859	5.4154	5.1767	4.6563	4.4627	5.1332	5.2672	4.2006	4.8709
neg_5308	PI(16:0/18:2(9Z,12Z))	metab_11304	833.518	neg	M-H	C43H79O13P	10.534	2.7097	2.8402	1.1652	0.01833	0.2099	4.448	4.3267	4.3147	5.147	4.7392	4.4871	4.0026	3.7776	4.271	4.4236	3.0948	3.9958
neg_5619	PI(16:0/20:4(5Z,8Z,11Z,14Z))	metab_11615	857.518	neg	M-H	C45H79O13P	9.48407	2.872	3.0999	1.1609	0.0344	0.2614	5.6004	5.5634	5.5633	6.0322	5.7545	5.5201	5.1455	4.9413	5.363	5.4441	3.3793	5.0453
pos_5684	2-Phenylacetamide	metab_5683	136.075	pos	M+H	C8H9NO	0.7941	1.3251	1.1713	1.0236	0.0202	0.2154	5.2814	5.4306	5.337	5.3715	5.3147	5.2168	5.3039	5.1687	5.161	5.0776	5.2564	5.2422
pos_5688	4-Hydroxybenzaldehyde	metab_5687	123.044	pos	M+H	C7H6O2	0.7941	1.3993	1.2335	1.0273	0.01486	0.1961	4.9229	5.0752	4.9828	5.0053	4.9576	4.8656	4.9357	4.8044	4.7929	4.7059	4.8925	4.8838
neg_5740	7Z, 10Z, 13Z, 16Z, 19Z-docosapentaenoic acid	metab_11736	329.249	neg	M-H	C22H34O2	9.26012	1.8779	1.6744	1.0644	0.004881	0.1392	3.664	3.7665	3.571	3.8192	3.6352	3.5111	3.4711	3.5831	3.3207	3.4263	3.3493	3.4879
pos_5816	L-Carnitine	metab_5815	162.112	pos	M+H	C7H15NO3	0.610183	1.1249	1.1128	1.0155	0.01404	0.1927	5.7602	5.6715	5.756	5.6207	5.6456	5.6564	5.6285	5.5373	5.6181	5.5928	5.5626	5.6462
pos_5843	Choline	metab_5842	104.107	pos	M+H	C5H13NO	0.591033	1.3033	1.1528	0.9833	0.003198	0.1296	5.8696	5.8623	5.8075	5.8921	5.8469	5.9748	5.951	5.9868	5.9983	6.0223	5.9576	5.943
neg_6090	LysoPC(P-18:0)	metab_12085	552.367	neg	M+FA-H	C26H54NO6P	8.63918	1.2956	1.1078	0.9836	0.004461	0.1389	5.8165	5.7255	5.7813	5.8031	5.7095	5.7368	5.8784	5.8806	5.8467	5.9207	5.8397	5.7827
neg_6236	2-hydroxy-6-pentadecylbenzoic acid	metab_12231	347.259	neg	M-H	C22H36O3	8.23932	2.1439	1.9229	0.9422	0.001407	0.1042	4.5679	4.5067	4.317	4.3342	4.2734	4.4247	4.6385	4.7731	4.7613	4.7399	4.545	4.5862
neg_6275	12alpha-hydroxy-3-oxo-5beta-cholan-24-oic Acid	metab_12270	371.259	neg	M-H2O-H	C24H38O4	8.12928	2.3033	2.1436	0.9051	0.005366	0.1406	3.727	3.7244	3.2693	3.2466	3.2319	3.4699	3.726	3.9357	3.8021	3.8843	3.7235	3.7625
neg_6359	Allylestrenol	metab_12354	345.243	neg	M+FA-H	C21H32O	7.88517	2.2227	2.0061	0.9397	0.001202	0.09873	4.7427	4.6832	4.3998	4.4904	4.388	4.5766	4.822	4.8883	4.8891	4.9023	4.7652	4.7649
neg_6374	PS(20:4(8Z,11Z,14Z,17Z)/22:2(13Z,16Z))	metab_12369	862.56	neg	M-H	C48H82NO10P	7.79783	1.784	1.5865	0.9715	0.0002977	0.05636	5.9277	5.8666	5.8569	5.9325	5.8637	5.9108	5.9691	6.0757	6.1586	6.121	6.0067	6.0626
neg_6383	Cortolone	metab_12378	387.215	neg	M+Na-2H	C21H34O5	7.79783	1.4623	1.3891	0.9706	0.002795	0.1257	4.908	4.9184	4.9182	4.772	4.8152	4.8105	4.9074	4.9483	5.0792	5.0291	5.014	5.0466
neg_6407	LysoPE(16:1(9Z)/0:0)	metab_12402	450.263	neg	M-H	C21H42NO7P	7.73213	1.5465	1.4684	1.0363	0.006207	0.1436	4.911	4.7783	5.0024	5.0477	5.1133	4.9377	4.7842	4.83	4.8407	4.7922	4.7447	4.7541
neg_6976	Glycocholic acid	metab_12971	464.302	neg	M-H	C26H43NO6	5.73602	2.9667	2.6314	1.1587	0.002311	0.1151	3.6369	3.7808	3.645	3.6364	4.2116	3.822	3.1227	3.6482	3.1209	3.1136	3.4309	3.182
neg_7747	Suberic acid	metab_13742	173.081	neg	M-H	C8H14O4	2.97102	1.127	1.1693	1.0249	0.01832	0.2099	4.2105	4.2005	4.1094	4.1879	4.2568	4.1966	4.1376	4.1436	4.1782	4.0588	3.9771	4.0551
neg_7808	D-Pantothenic acid	metab_13803	240.085	neg	M+Na-2H	C9H17NO5	2.79073	1.6838	1.5374	1.071	0.0432	0.2798	3.2726	3.5683	3.4129	3.7177	3.9047	3.6649	3.2801	3.296	3.564	3.2776	3.2989	3.3969
neg_7852	Tyrosyl-Hydroxyproline	metab_13847	275.104	neg	M-H2O-H	C14H18N2O5	2.68007	1.5973	1.4986	1.0753	0.0443	0.2823	2.8086	3.2285	2.9331	3.3315	3.3402	3.2155	3.0469	2.9826	2.8407	2.8443	2.9226	2.8986
neg_9010	Citrulline	metab_15005	174.087	neg	M-H	C6H13N3O3	0.597183	1.386	1.2759	1.029	0.00301	0.1296	4.3228	4.464	4.432	4.4836	4.4776	4.4304	4.3786	4.3308	4.2317	4.3243	4.2699	4.3253
neg_9014	L-Glutamate	metab_15009	146.045	neg	M-H	C5H9NO4	0.597183	1.3333	1.3396	0.9781	0.000326	0.05834	4.5544	4.5913	4.5587	4.6386	4.6142	4.6003	4.6945	4.6792	4.6364	4.7243	4.7258	4.7131
